# Supplementary material
Source: Springer Nature journal article supplement (https://www.springermedizin.de/resource/supplementary/12968_2008_484_MOESM3_ESM.pdf/9579088)
Supplement: MOESM3 [file 9579088]

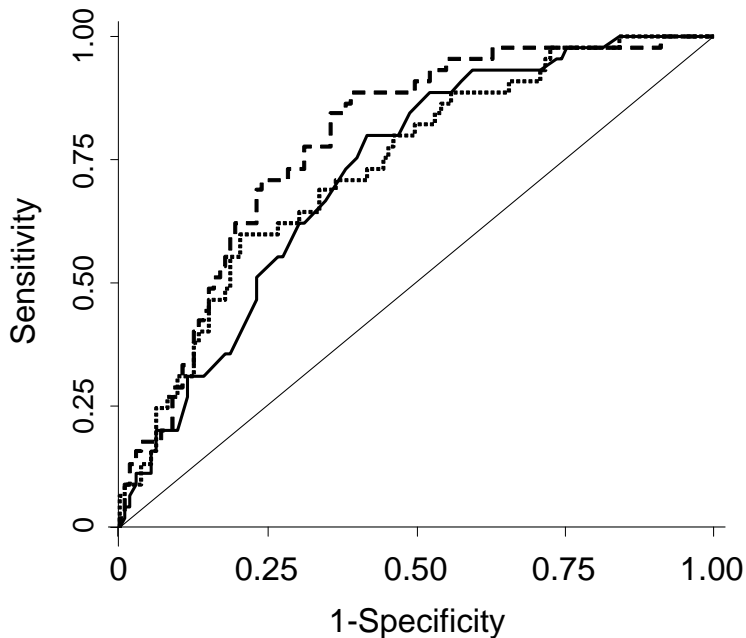

— Age and sex (AUC=0.707)

..... Age, sex, and risk factors (AUC=0.725)

- - - Age, sex, risk factors and SD of wall thickness (AUC=0.788)

P-value comparing AUC for age and sex with age, sex, and risk factors = 0.617

P-value comparing AUC for age and sex with full model = 0.044

P-value comparing AUC for age, sex, and risk factors with full model = 0.05

Risk factors include history of ever smoking, body mass index, hypertension and diabetes mellitus

Full model includes age, sex, risk factors, and standard deviation of wall thickness
